# Supplementary material for: Red cell distribution width as a new prognostic biomarker in refractory chronic graft-versus-host disease
Source: PubMed Central journal article supplement — Haematologica. 2023 Aug 17;109(1):298–302. doi: 10.3324/haematol.2023.283646 (PMC10772496; doi:10.3324/haematol.2023.283646), 2023-08-17

# Red cell distribution width as a new prognostic biomarker in refractory chronic graft-versus-host disease

Eduard Schulz,<sup>1,2</sup> Filip Pirs,<sup>1</sup> Noa G. Holtzman,<sup>1,2</sup> David Beshensky,<sup>1</sup> Edward W. Cowen,<sup>3</sup> Sandra A. Mitchell,<sup>4</sup> Seth M. Steinberg<sup>5</sup> and Steven Z. Pavletic<sup>1,2</sup>

<sup>1</sup>Center for Cancer Research, National Cancer Institute, National Institutes of Health, Bethesda; <sup>2</sup>Myeloid Malignancies Program, National Institutes of Health, Bethesda; <sup>3</sup>Dermatology Branch, National Institute of Arthritis and Musculoskeletal and Skin Diseases, National Institutes of Health, Bethesda; <sup>4</sup>Outcomes Research Branch, Division of Cancer Control and Population Sciences, National Cancer Institute, Rockville and <sup>5</sup>Biostatistics and Data Management Section, National Cancer Institute, National Institutes of Health, Bethesda, MD, USA

Correspondence:

S. PAVLETIC - pavletis@mail.nih.gov

<https://doi.org/10.3324/haematol.2023.283646>

Received: May 30, 2023.

Accepted: August 10, 2023.

Early view: August 17, 2023.

©2024 NIH (National Institutes of Health)

**Supplementary Table S1: Characteristics of the patients and univariate and multivariable associations with RDW  $\geq 13.4\%$ .**

| Characteristic                                                                                        | N missing          | All patients                                                                         | RDW <13.4%                                                                        | RDW $\geq 13.4\%$                                                                 | P                          | Multiple logistic model | P <sup>^</sup> |
|-------------------------------------------------------------------------------------------------------|--------------------|--------------------------------------------------------------------------------------|-----------------------------------------------------------------------------------|-----------------------------------------------------------------------------------|----------------------------|-------------------------|----------------|
|                                                                                                       | Absolute count (%) | Absolute count (%), or median [IQR]                                                  | Absolute count (%), or median [IQR]                                               | Absolute count (%), or median [IQR]                                               |                            | OR (95%CI)              |                |
| <b>All patients</b>                                                                                   | 0 (0)              | 404 (100)                                                                            | 101 (25)                                                                          | 303 (75)                                                                          |                            |                         |                |
| <b>Age</b><br>Years                                                                                   | 0 (0)              | 404 (100)<br>47.2 [31.7-56.9]                                                        | 101 (25)<br>47.4 [35.2-56.3]                                                      | 303 (75)<br>47.2 [31.0-56.8]                                                      | 0.82*                      |                         |                |
| <b>Sex</b><br>Male<br>Female                                                                          | 0 (0)              | 404 (100)<br>231 (57.2)<br>173 (42.8)                                                | 101 (25)<br>55 (54.5)<br>46 (45.5)                                                | 303 (75)<br>176 (58.1)<br>127 (41.9)                                              | 0.56 <sup>#</sup>          |                         |                |
| <b>Race</b><br>Black<br>Hispanic<br>Other<br>White<br>Unknown                                         | 0 (0)              | 404 (100)<br>16 (4.0)<br>11 (2.7)<br>12 (3.0)<br>351 (86.9)<br>14 (3.5)              | 101 (25)<br>4 (4.0)<br>0<br>3 (3.0)<br>90 (89.1)<br>4 (4.0)                       | 303 (75)<br>12 (4.0)<br>11 (3.6)<br>9 (3.0)<br>261 (86.1)<br>10 (3.3)             | 0.37 <sup>‡</sup>          |                         |                |
| <b>Body mass index (kg/m<sup>2</sup>)</b><br><18.0<br>18.0-24.9<br>25.0-29.9<br>$\geq 30.0$<br>Median | 25 (6.2)           | 379 (93.8)<br>48 (12.7)<br>180 (47.5)<br>106 (28.0)<br>45 (11.9)<br>23.9 [20.5-27.2] | 101 (25)<br>14 (14.9)<br>41 (43.6)<br>28 (29.8)<br>11 (11.7)<br>23.7 [20.5- 27.1] | 303 (75)<br>34 (11.9)<br>139 (48.8)<br>78 (27.4)<br>34 (11.9)<br>24.0 [20.6-27.2] | 0.92 <sup>◊</sup><br>0.95* |                         |                |
| <b>Karnofsky performance status (%)</b><br>90-100<br>80<br><80                                        | 10 (2.5)           | 394 (97.5)<br>130 (33.0)<br>131 (33.3)<br>133 (33.8)                                 | 101 (25)<br>44 (44.4)<br>36 (36.4)<br>19 (19.2)                                   | 303 (75)<br>86 (29.2)<br>95 (32.2)<br>114 (38.6)                                  | 0.0003 <sup>◊</sup>        |                         |                |
| <b>Disease</b><br>AML, ALL, MDS<br>MPN including CML<br>CLL<br>Lymphoma<br>Other                      | 3 (0.7)            | 401 (99.3)<br>203 (50.6)<br>46 (11.5)<br>22 (5.5)<br>84 (21.0)<br>46 (11.5)          | 101 (25)<br>45 (45)<br>19 (19)<br>4 (4)<br>17 (17)<br>15 (15)                     | 303 (75)<br>158 (52.5)<br>27 (9.0)<br>18 (6.0)<br>67 (22.3)<br>31 (10.3)          | 0.0426 <sup>‡</sup>        |                         |                |

|                                                |            |                  |                   |                  |                     |  |
|------------------------------------------------|------------|------------------|-------------------|------------------|---------------------|--|
| <b>Donor relationship</b>                      | 6 (1.5)    | 398 (98.5)       |                   |                  |                     |  |
| Related                                        |            | 225 (56.5)       | 57 (57.0)         | 168 (56.4)       |                     |  |
| Unrelated                                      |            | 173 (43.5)       | 43 (43.0)         | 130 (43.6)       | 1.00 <sup>#</sup>   |  |
| <b>Donor stem cell source</b>                  | 3 (0.7)    | 401 (99.3)       |                   |                  |                     |  |
| Peripheral blood                               |            | 311 (77.6)       | 70 (70.0)         | 241 (80.1)       |                     |  |
| Bone marrow                                    |            | 78 (19.5)        | 28 (28.0)         | 50 (16.6)        |                     |  |
| Cord blood                                     |            | 12 (3.0)         | 2 (2.0)           | 10 (3.3)         | 0.0460 <sup>‡</sup> |  |
| <b>Conditioning</b>                            | 7 (1.7)    | 397 (98.3)       |                   |                  |                     |  |
| Myeloablative                                  |            | 168 (42.3)       | 39 (39.0)         | 129 (43.4)       |                     |  |
| Non-myeloablative                              |            | 229 (57.7)       | 61 (61.0)         | 168 (56.6)       | 0.48 <sup>#</sup>   |  |
| <b>HLA match</b>                               | 14 (3.5)   | 390 (96.5)       |                   |                  |                     |  |
| Yes                                            |            | 329 (84.4)       | 78 (78.8)         | 251 (86.3)       |                     |  |
| No                                             |            | 61 (15.6)        | 21 (21.2)         | 40 (13.8)        | 0.08 <sup>#</sup>   |  |
| <b>Recipient CMV status</b>                    | 138 (34.2) | 266 (65.8)       |                   |                  |                     |  |
| Negative                                       |            | 142 (53.4)       | 40 (58.0)         | 102 (51.8)       |                     |  |
| Positive                                       |            | 124 (46.6)       | 29 (42.0)         | 95 (48.2)        | 0.4 <sup>#</sup>    |  |
| <b>Time (months)</b>                           | 0 (0)      |                  |                   |                  |                     |  |
| Time from HCT to CGVHD diagnosis               |            | 7.6 [4.7-12.3]   | 8.28 [5.2-12.8]   | 7.5 [4.6-12.0]   | 0.21 <sup>*</sup>   |  |
| Time from CGVHD diagnosis to study consent     |            | 24.5 [12.1-49.1] | 26.35 [13.4-54.7] | 24.2 [11.3-46.6] | 0.32 <sup>*</sup>   |  |
| Time from HCT to study consent                 |            | 35.6 [22.6-58.6] | 38.21 [23.2-67.8] | 35.1 [22.2-56.7] | 0.19 <sup>*</sup>   |  |
| <b>History of prior acute GVHD grade II-IV</b> | 4 (1)      | 400 (99.0)       |                   |                  |                     |  |
| No                                             |            | 121 (30.3)       | 30 (30.0)         | 91 (30.3)        |                     |  |
| Yes                                            |            | 279 (69.8)       | 70 (70.0)         | 209 (69.7)       | 1.00 <sup>#</sup>   |  |
| <b>NIH global score</b>                        | 6 (1.5)    | 398 (98.5)       |                   |                  |                     |  |
| Mild                                           |            | 8 (2.0)          | 3 (3.0)           | 5 (1.7)          |                     |  |
| Moderate                                       |            | 102 (25.6)       | 36 (37.9)         | 66 (22.4)        |                     |  |
| Severe                                         |            | 288 (72.4)       | 59 (62.1)         | 229 (77.6)       | 0.0008 <sup>◊</sup> |  |
| <b>NIH organ involvement</b>                   |            |                  |                   |                  |                     |  |
| <i>Ocular</i>                                  | 5 (1.2)    | 399 (98.8)       |                   |                  |                     |  |
| None                                           |            | 90 (22.6)        | 26 (26)           | 64 (21.4)        |                     |  |
| Mild                                           |            | 124 (31.1)       | 32 (32)           | 92 (30.8)        |                     |  |
| Moderate                                       |            | 122 (30.6)       | 25 (25)           | 97 (32.4)        |                     |  |
| Severe                                         |            | 63 (15.8)        | 17 (17)           | 46 (15.9)        | 0.4473 <sup>◊</sup> |  |
| <i>Skin</i>                                    | 6 (1.5)    | 398 (98.5)       |                   |                  |                     |  |
| None                                           |            | 86 (21.6)        | 30 (30.6)         | 56 (18.7)        |                     |  |

|                                              |          |            |           |            |                     |                  |
|----------------------------------------------|----------|------------|-----------|------------|---------------------|------------------|
| Mild                                         |          | 76 (19.1)  | 21 (21.4) | 55 (18.3)  |                     |                  |
| Moderate                                     |          | 63 (15.8)  | 16 (16.3) | 47 (15.7)  |                     |                  |
| Severe                                       |          | 173 (43.5) | 31 (31.6) | 142 (47.3) | 0.0023 <sup>◊</sup> |                  |
| <i>Lung</i>                                  | 7 (1.7)  | 397 (98.3) |           |            |                     |                  |
| None                                         |          | 111 (28.0) | 35 (35)   | 76 (25.6)  |                     |                  |
| Mild                                         |          | 151 (38.0) | 39 (39)   | 112 (37.7) |                     |                  |
| Moderate                                     |          | 94 (23.7)  | 17 (17)   | 77 (25.9)  |                     |                  |
| Severe                                       |          | 41 (10.3)  | 9 (9)     | 32 (10.8)  | 0.0463 <sup>◊</sup> |                  |
| <i>Oral</i>                                  | 5 (1.2)  | 399 (98.8) |           |            |                     | 1.77 (1.20-2.60) |
| None                                         |          | 138 (34.6) | 46 (46)   | 92 (30.8)  |                     | Reference        |
| Mild                                         |          | 202(50.6)  | 44 (44)   | 158 (52.8) |                     |                  |
| Moderate                                     |          | 45 (11.3)  | 9 (9)     | 36 (12.0)  |                     |                  |
| Severe                                       |          | 14 (3.5)   | 1 (1)     | 13 (4.4)   | 0.0043 <sup>◊</sup> |                  |
| <i>Joints and fascia</i>                     | 5 (1.2)  | 399 (98.8) |           |            |                     |                  |
| None                                         |          | 154 (38.6) | 44 (44.4) | 110 (36.7) |                     |                  |
| Mild                                         |          | 92 (23.1)  | 23 (23.2) | 69 (23.0)  |                     |                  |
| Moderate                                     |          | 99 (24.8)  | 23 (23.2) | 76 (25.3)  |                     |                  |
| Severe                                       |          | 54 (13.5)  | 9 (9.1)   | 45 (15.0)  | 0.0819 <sup>◊</sup> |                  |
| <i>Liver</i>                                 | 7 (1.7)  | 397 (98.3) |           |            |                     |                  |
| None                                         |          | 205 (51.6) | 53 (53.5) | 152 (51.0) |                     |                  |
| Mild                                         |          | 126 (31.7) | 33 (33.3) | 93 (31.2)  |                     |                  |
| Moderate                                     |          | 59 (14.9)  | 12 (12.1) | 47 (15.8)  |                     |                  |
| Severe                                       |          | 7 (1.8)    | 1 (1.0)   | 6 (2.0)    | 0.3721 <sup>◊</sup> |                  |
| <i>Gastrointestinal tract</i>                | 5 (1.2)  | 399 (98.8) |           |            |                     |                  |
| None                                         |          | 227 (56.9) | 57 (57)   | 170 (56.9) |                     |                  |
| Mild                                         |          | 127 (31.8) | 36 (36)   | 91 (30.4)  |                     |                  |
| Moderate                                     |          | 25 (6.3)   | 6 (6)     | 19 (6.4)   |                     |                  |
| Severe                                       |          | 20 (5.0)   | 1 (1)     | 19 (6.4)   | 0.2349 <sup>◊</sup> |                  |
| <i>Genitals (females only)</i>               | 0 (0)    | 173 (100)  |           |            |                     |                  |
| None                                         |          | 81 (46.8)  | 19 (41.3) | 62 (48.8)  |                     |                  |
| Mild                                         |          | 34 (19.7)  | 8 (17.4)  | 26 (20.5)  |                     |                  |
| Moderate                                     |          | 26 (15.0)  | 8 (17.4)  | 18 (14.2)  |                     |                  |
| Severe                                       |          | 32 (18.5)  | 11 (23.9) | 21 (16.5)  | 0.2033 <sup>◊</sup> |                  |
| <b>Immunosuppressive drugs at evaluation</b> | 15 (3.7) | 389 (96.3) |           |            |                     |                  |
| Number of prior lines of CGVHD therapy       |          | 4 [2-5]    | 3 [2-5]   | 4 [3-5]    | 0.0047*             |                  |

|                                                        |          |                     |                      |                     |          |                  |         |
|--------------------------------------------------------|----------|---------------------|----------------------|---------------------|----------|------------------|---------|
| Number of concurrent CGVHD treating agents             |          | 2 [1-3]             | 1 [0-2]              | 2 [1-3]             | <0.0001* |                  |         |
| <i>Steroids at evaluation</i>                          | 15 (3.7) | 389 (96.3)          |                      |                     |          |                  |         |
| No                                                     |          | 140 (36.0)          | 53 (53.5)            | 87 (30)             |          |                  |         |
| Yes                                                    |          | 249 (64.0)          | 46 (46.6)            | 203 (70)            | <0.0001# |                  |         |
| Dose (mg/kg/day prednisone equivalent)                 |          | 0.10 [0-0.31]       | 0 [0-0.14]           | 0.14 [0-0.35]       | <0.0001* |                  |         |
| <i>Calcineurin inhibitor</i>                           | 15 (3.7) | 389 (96.3)          |                      |                     |          |                  |         |
| No                                                     |          | 205 (52.7)          | 51 (51.5)            | 154 (53.1)          |          |                  |         |
| Yes                                                    |          | 184 (47.3)          | 48 (48.5)            | 136 (46.9)          | 0.8162#  |                  |         |
| <i>Mycophenolate mofetil</i>                           | 15 (3.7) | 389 (96.3)          |                      |                     |          |                  |         |
| No                                                     |          | 285 (73.3)          | 76 [76.8]            | 209 [72.1]          |          |                  |         |
| Yes                                                    |          | 104 (26.7)          | 23 [23.2]            | 81 [27.9]           | 0.4303#  |                  |         |
| <i>mTOR inhibitor</i>                                  | 15 (3.7) | 389 (96.3)          |                      |                     |          |                  |         |
| No                                                     |          | 313 (80.5)          | 92 (92.9)            | 221 (76.2)          |          | Reference        |         |
| Yes                                                    |          | 76 (19.5)           | 7 (7.1)              | 69 (23.8)           | 0.0002#  | 3.49 (1.47-8.29) | 0.0047  |
| <i>Tyrosine kinase inhibitor</i>                       | 15 (3.7) | 389 (96.3)          |                      |                     |          |                  |         |
| No                                                     |          | 371 (95.4)          | 98 (99.0)            | 273 (94.1)          |          |                  |         |
| Yes                                                    |          | 18 (4.7)            | 1 (1.0)              | 17 (5.9)            | 0.0523#  |                  |         |
| <b>Extracorporeal photopheresis at evaluation</b>      | 15 (3.7) | 389 (96.3)          |                      |                     |          |                  |         |
| No                                                     |          | 315 (81.0)          | 89 (89.9)            | 226 (77.9)          | 0.0077#  |                  |         |
| Yes                                                    |          | 74 (19.0)           | 10 (10.1)            | 64 (22.1)           |          |                  |         |
| <b>Blood cell indices</b>                              |          |                     |                      |                     |          |                  |         |
| White blood cell count, absolute (x10 <sup>9</sup> /L) | 3 (0.7)  | 7.5 [5.5-9.8]       | 6.4 [5.0-9.1]        | 7.8 [5.8-10.0]      | 0.0022*  |                  |         |
| Neutrophils, absolute (x10 <sup>9</sup> /L)            | 4 (1)    | 4.7 [3.4-6.7]       | 3.7 [2.7-5.5]        | 5.2 [3.7-7.0]       | <0.0001* | 1.21 (1.07-1.36) | 0.0016  |
| Lymphocytes, absolute (x10 <sup>9</sup> /L)            | 4 (1)    | 1.2 [0.6-2.2]       | 1.6 [1.1-2.4]        | 1.1 [0.6-2.1]       | 0.0002*  |                  |         |
| Eosinophils, absolute (x10 <sup>9</sup> /L)            | 3 (0.7)  | 0.07 [0.02-0.16]    | 0.11 [0.06-0.16]     | 0.06 [0.01-0.16]    | <0.0001* |                  |         |
| Hemoglobin (g/dL)                                      | 2 (0.5)  | 12.5 [11.2-13.8]    | 13.3 [12.5-14.1]     | 12.2 [10.8-13.5]    | <0.0001* | 0.68 (0.57-0.80) | <0.0001 |
| Mean corpuscular volume (fL)                           | 0 (0)    | 95.4 [89.4-100.5]   | 96.4 [92.7-100.8]    | 95.0 [88.7-100.4]   | 0.022*   |                  |         |
| RDW (%)                                                | N/A      | 14.5 [13.4-16.0]    | 12.7 [12.3-13.0]     | 15.2 [14.2-16.7]    | N/A      |                  |         |
| Reticulocytes (%)                                      | 14 (3.5) | 1.6 [1.2-2.5]       | 1.4 [1.1-2.0]        | 1.8 [1.2-2.6]       | 0.0012*  |                  |         |
| Platelets (x10 <sup>9</sup> /L)                        | 2 (0.5)  | 248 [186-317]       | 245 [195-316]        | 251 [183-317]       | 0.82*    |                  |         |
| <b>Inflammation</b>                                    |          |                     |                      |                     |          |                  |         |
| C-reactive protein (mg/L)                              | 8 (2)    | 2 [0.6-7.6]         | 0.8 [0.4-2.7]        | 3.1 [0.8-8.9]       | <0.0001* |                  |         |
| Interleukin 6 (pg/mL)                                  | 297 (74) | 11.4 [6.3-22.7]     | 10.30 [4.8-18.4]     | 14.60 [6.9-25.4]    | 0.10*    |                  |         |
| Erythrocyte sedimentation rate (mm/h)                  | 19 (4.7) | 16 [8-34]           | 13.0 [6.0-24.5]      | 18.0 [8.0-36.0]     | 0.0012*  |                  |         |
| Ferritin (ng/mL)                                       | 4 (1)    | 373.5 [89.3-1321.5] | 450.0 [115.0-1217.5] | 337.5 [80.5-1413.3] | 0.33*    |                  |         |

|                                   |         |                     |                     |                     |          |                  |         |
|-----------------------------------|---------|---------------------|---------------------|---------------------|----------|------------------|---------|
| C3 (mg/dL)                        | 9 (2.2) | 134 [118.0-151.5]   | 124.0 [112.0-144.0] | 136.0 [122.7-156.0] | 0.0002*  |                  |         |
| C4 (mg/dL)                        | 9 (2.2) | 27.9 [22.2-33.0]    | 24.8 [20.0-29.8]    | 28.9 [23.0-35.0]    | <0.0001* |                  |         |
| <b>Other organ functions</b>      |         |                     |                     |                     |          |                  |         |
| Lactate dehydrogenase (U/L)       | 12 (3)  | 220.0 (179.0-288.0) | 184.5 [150.0-212.5] | 237 [192.0-304.3]   | <0.0001* | 1.01 (1.01-1.02) | <0.0001 |
| Bilirubin (mg/dL)                 | 5 (1.2) | 0.5 [0.3-0.6]       | 0.6 [0.4-0.7]       | 0.4 [0.3-0.6]       | <0.0001* |                  |         |
| eGFR (mL/min/1.73m <sup>2</sup> ) | 2 (0.5) | 95.6 [69.2-116.1]   | 90.1 [65.6-109.2]   | 97.3 [71.2-117.1]   | 0.12*    |                  |         |
| Albumin (g/dL)                    | 3 (0.7) | 3.8 [3.5-4.1]       | 3.9 [3.6-4.1]       | 3.7 [3.4-4.1]       | 0.013*   |                  |         |
| Immunoglobulin G (g/L)            | 9 (2.2) | 6.3 [4.4-9.8]       | 6.9 [5.4-10.9]      | 5.9 [4.0-9.1]       | 0.0031*  |                  |         |

ALL: acute lymphoblastic leukemia; AML: acute myeloid leukemia; CGVHD: chronic graft-versus-host disease; CLL: chronic lymphocytic leukemia; CML: chronic myeloid leukemia; CMV: cytomegalovirus; eGFR: estimated glomerular filtration rate according to Chronic Kidney Disease Epidemiology Collaboration 2021; IQR: interquartile range; MDS: myelodysplastic neoplasms; MPN: myeloproliferative neoplasm; mTOR: mammalian target of rapamycin; OR: odds ratio; RDW: red cell distribution width.

\*Wilcoxon rank sum test; #Fisher's exact test; †Mehta's modification to Fisher's exact test; °Cochran-Armitage trend test; ▲Multivariable logistic regression analysis: Only significant p-values of independent factors shown.

**Supplementary Figure S1: Relapse-free survival, relapse incidence and non-relapse mortality according to RDW  $\geq 13.4\%$ .**

(A) Relapse-free survival was defined as time from enrollment until relapse or death restricted to patients transplanted for hematological neoplasms.

(B) Cumulative incidence of relapse was defined as time from study enrollment to relapse with non-relapse mortality as a competing risk. (C)

Cumulative incidence of non-relapse mortality was defined as time from study enrollment to death with relapse as a competing risk. P-values correspond to full curve analyses.

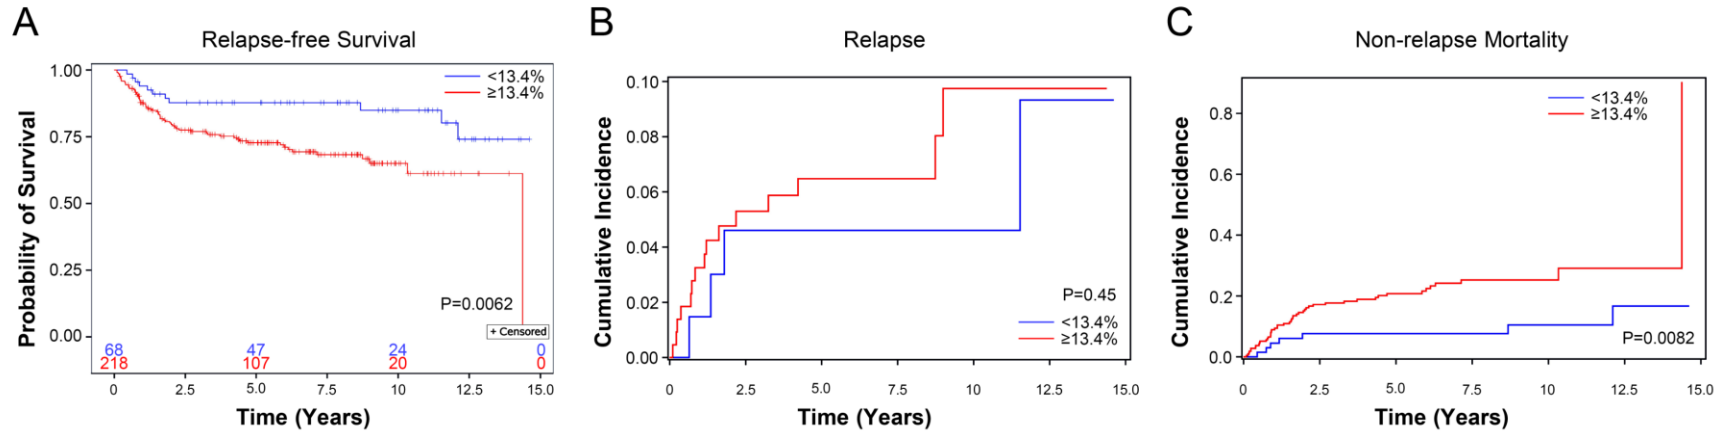

**Supplementary Figure S2: Overall survival according to CRP.**

(A) Quartiles. 1<sup>st</sup> quartile: <0.63 mg/dL; 2<sup>nd</sup> quartile: 0.63-2.0 mg/dL; 3<sup>rd</sup> quartile: 2.01-7.58 mg/dL; 4<sup>th</sup> quartile:  $\geq 7.59$  mg/dL. P=0.017. (B) Two groups could be distinguished, separated at 7.6 mg/L which is around the upper limit of normal of most non-high-sensitivity CRP tests (upper limit of normal of the high-sensitivity CRP test at NIH Clinical Center: 5 mg/L). However, CRP  $\geq 7.6$  mg/L was not independently associated with overall survival in the Cox model (HR=1.147, 95% CI: 0.783-1.679; p=0.4819). The asterisk (\*) denotes a p-value that was adjusted for three implicit cut-points that could have been used when dividing the groups into quartiles.

**A**

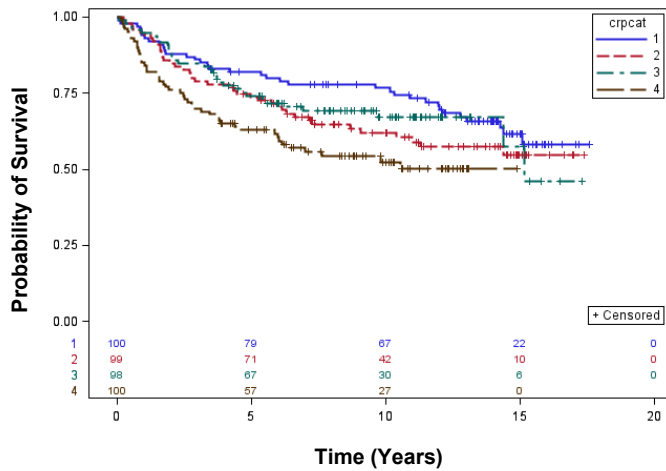

**B**

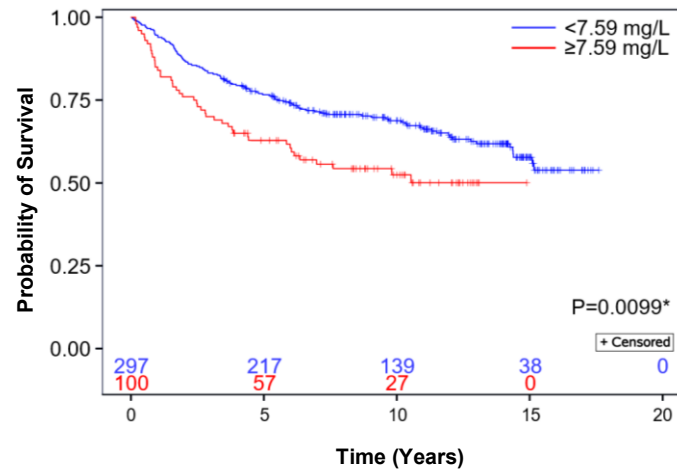

Supplement: 2023_283646_SCHULZ_SUPPL.pdf [file 2023_283646_SCHULZ_SUPPL.pdf]
